# Supplementary material for: Oxygen therapy and inpatient mortality in COPD exacerbation
Source: HighWire-hosted journal article supplement (doi:10.1136/emermed-2019-209257), 2020-11-26
Supplement: emermed-2019-209257supp001_data_supplement.pdf [file emermed-2019-209257supp001_data_supplement.pdf]

Appendix table 1a. Baseline characteristics between admission oxygen saturation groups in those receiving supplemental oxygen

|                                 | <88%          | 88-92%       | 93-96%        | 97-100%       | p (across all 4 groups) | p (88-92% v 97-100%) |
|---------------------------------|---------------|--------------|---------------|---------------|-------------------------|----------------------|
| Died/ n (%); (total = 1027)     | 25 / 147 (17) | 25 / 282 (9) | 44 / 375 (12) | 38 / 223 (17) | 0.012                   | 0.006                |
| Age, years, (SD)                | 72.5 (9.0)    | 73.8 (10.3)  | 72.8 (9.9)    | 73.7 (10.1)   | 0.413                   | 0.900                |
| Current smoker, %               | 35.2          | 40.6         | 39.7          | 37.6          | 0.682                   | 0.522                |
| Female, %                       | 37.9          | 44.6         | 45.3          | 45.3          | 0.434                   | 0.928                |
| Institutional care, %           | 6.4           | 7.9          | 5.4           | 8.5           | 0.430                   | 0.826                |
| Preadmission FEV1, L, (SD)      | 0.87 (0.38)   | 0.94 (0.42)  | 0.91 (0.39)   | 0.91 (0.45)   | 0.305                   | 0.415                |
| Preadm. FEV1 % predicted, (SD)  | 39.1 (15.4)   | 43.0 (17.8)  | 41.7 (17.2)   | 41.6 (18.4)   | 0.210                   | 0.382                |
| DECAF Score, (IQR)              | 2 (1-3)       | 2 (1-3)      | 2 (1-3)       | 2 (1-3)       | <0.001                  | 0.368                |
| eMRCd Score, (IQR)              | 5a (4-5a)     | 5a (4-5b)    | 5a (4-5a)     | 5a (4-5b)     | 0.583                   | 0.971                |
| NEWS2-Sats, (SD)                | 9.9 (2.5)     | 7.8 (2.7)    | 5.8 (2.5)     | 4.8 (2.4)     | <0.001                  | <0.001               |
| Eosinopenia less than 0.05, %   | 60.7          | 60.3         | 51.1          | 44.1          | <0.001                  | <0.001               |
| CXR consolidation, %            | 43.0          | 33.0         | 29.0          | 25.5          | 0.003                   | 0.078                |
| pH less than 7.35 / 7.3, %      | 53.8 / 34.9   | 18.9 / 9.7   | 26.1 / 12.3   | 31.5 / 20.1   | <0.001 / <0.001         | 0.001 / 0.001        |
| AF, %                           | 18.8          | 12.5         | 16.1          | 16.1          | 0.359                   | 0.248                |
| Pulse rate, (SD)                | 108 (22)      | 104 (19)     | 104 (21)      | 106 (21)      | 0.170                   | 0.380                |
| Respiratory rate, (SD)          | 27.1 (7.7)    | 25.0 (6.4)   | 25.2 (6.5)    | 26.3 (6.9)    | 0.009                   | 0.033                |
| BP, systolic, mmHg (SD)         | 136 (31)      | 135 (25)     | 139 (28)      | 141 (26)      | 0.045                   | 0.009                |
| Temperature, °C, (SD)           | 36.9 (1.1)    | 36.9 (1.0)   | 36.9 (0.9)    | 36.7 (0.9)    | 0.067                   | 0.012                |
| Temperature 38°C or more, %     | 18.3          | 13.7         | 11.9          | 6.6           | 0.006                   | 0.013                |
| Charlson Index, (IQR)           | 2 (1-3)       | 2 (1-3)      | 2 (1-3)       | 2 (1-3)       | 0.601                   | 0.214                |
| Cor-pulmonale, %                | 23.9          | 7.8          | 8.5           | 7.7           | <0.001                  | 1.000                |
| Cerebrovascular disease, %      | 7.5           | 13.5         | 12.9          | 12.9          | 0.265                   | 0.446                |
| IHD, %                          | 27.0          | 27.4         | 32.2          | 26.7          | 0.416                   | 0.841                |
| Left sided Heart failure, %     | 15.7          | 13.3         | 11.6          | 9.4           | 0.289                   | 0.207                |
| Diabetes, %                     | 14.1          | 13.6         | 12.3          | 10.4          | 0.645                   | 0.276                |
| pO <sub>2</sub> , kPa (SD)      | 8.9 (5.7)     | 8.7 (3.0)    | 10.2 (4.6)    | 13.9 (9.4)    | <0.001                  | <0.001               |
| pCO <sub>2</sub> , kPa (SD)     | 8.4 (3.5)     | 6.6 (2.4)    | 6.6 (2.1)     | 7.2 (3.2)     | <0.001                  | 0.016                |
| HCO <sub>3</sub> , mmol/L, (SD) | 31.5 (9.3)    | 29.2 (6.9)   | 29.1 (6.2)    | 29.4 (6.2)    | 0.039                   | 0.647                |
| Albumin <36 g/l, %              | 32.3          | 25.6         | 24.7          | 19.7          | 0.043                   | 0.107                |
| CRP, mg/L, (SD)                 | 98.1 (122.8)  | 91.0 (107.2) | 84.5 (101.7)  | 68.5 (89.4)   | 0.030                   | 0.011                |
| WCC, 10 <sup>9</sup> /L, (SD)   | 14.1 (8.7)    | 13.2 (5.7)   | 13.8 (6.8)    | 13.2 (8.2)    | 0.459                   | 0.929                |
| Treated with NIV, %             | 51.7          | 19.6         | 20.5          | 25.4          | <0.001                  | 0.131                |

Data are shown as means with standard deviations (SD), medians with interquartile range (IQR), or percentages (%). Statistical tests used were Anova or Welch for 4 means; independent T test for 2 means, independent samples Kruskal Wallis for 4 medians, Mann Whitney for 2 medians; and Fishers exact test for proportions

Appendix table 1a, comments.

The PaO<sub>2</sub> values are higher in the oxygen saturation group of <88% (8.9kPa), than they are for the oxygen saturation range of 88-92% (8.7kPa), which appears contradictory. This observation can be accounted for by 1) patients in the “admission saturations 87% or less” group are more likely to be put on oxygen between their original admission saturation and their blood gas being performed, and 2) the fact the data for the “admission saturations 87% or less” group is skewed to the right (87% or less group= Median 7.1; 88-92%= median 8.2)

Appendix table 1b. Baseline characteristics between admission oxygen saturation groups in those not receiving supplemental oxygen

|                                     | <88%           | 88-92%         | 93-96%         | 97-100%       | p      |
|-------------------------------------|----------------|----------------|----------------|---------------|--------|
| Died/ n (%); (total = 1618)         | 37 / 401 (9.2) | 35 / 479 (7.3) | 20 / 569 (3.5) | 4 / 169 (2.6) | <0.001 |
| Age, years, (SD)                    | 73.6 (10.3)    | 73.8 (9.9)     | 72.5 (10.4)    | 70.8 (11.2)   | 0.007  |
| Current smoker, %                   | 42.4           | 43.2           | 41.9           | 40.7          | 0.938  |
| Female, %                           | 40.1           | 44.1           | 53.1           | 50.5          | <0.001 |
| Institutional care, %               | 7.5            | 4.2            | 3.3            | 4.7           | 0.030  |
| Preadmission FEV1, L, (SD)          | 0.98 (0.45)    | 1.06 (0.46)    | 1.13 (0.50)    | 1.13 (0.49)   | <0.001 |
| Preadmission FEV1 % predicted, (SD) | 44.7 (18.7)    | 47.4 (17.1)    | 48.3 (18.4)    | 48.6 (20.3)   | 0.020  |
| DECAF Score, (IQR)                  | 2 (1-3)        | 1 (1-2)        | 1 (0-2)        | 1 (0-2)       | <0.001 |
| eMRCD Score, (IQR)                  | 4 (4-5a)       | 4 (4-5a)       | 4 (4-5a)       | 4 (4-5a)      | 0.030  |
| NEWS2-Sats, (SD)                    | 7.6 (2.2)      | 6.0 (2.5)      | 4.2 (2.2)      | 3.3 (2.1)     | <0.001 |
| Eosinopenia less than 0.05, %       | 58.4           | 50.1           | 42.7           | 43.7          | <0.001 |
| CXR consolidation, %                | 38.4           | 29.6           | 24.5           | 18.4          | <0.001 |
| pH less than 7.35 / 7.3, %          | 28.3 / 15.2    | 9.6 / 4.6      | 11.0 / 4.5     | 12.7 / 4.7    | <0.001 |
| AF, %                               | 13.5           | 15.7           | 17.4           | 14.8          | 0.412  |
| Pulse rate, (SD)                    | 104 (21)       | 102 (21)       | 98 (20)        | 98 (22)       | <0.001 |
| Respiratory rate, (SD)              | 27.4 (6.6)     | 24.6 (5.6)     | 23.4 (5.3)     | 23.8 (6.0)    | <0.001 |
| BP, systolic, mmHg (SD)             | 139 (31)       | 139 (27)       | 136 (26)       | 142 (25)      | 0.019  |
| Temperature, °C, (SD)               | 36.9 (0.9)     | 36.9 (0.9)     | 36.8 (0.9)     | 36.8 (0.8)    | 0.050  |
| Temperature 38°C or more, %         | 14.5           | 13.8           | 11.1           | 9.0           | 0.154  |
| Charlson Index, (IQR)               | 2 (1-3)        | 2 (1-3)        | 2 (1-3)        | 2 (1-3)       | 0.826  |
| Cor-pulmonale, %                    | 13.5           | 5.0            | 4.9            | 5.8           | <0.001 |
| Cerebrovascular disease, %          | 13.5           | 11.7           | 13.0           | 17.9          | 0.141  |
| IHD, %                              | 25.5           | 28.6           | 33.4           | 29.5          | 0.059  |
| Left sided Heart failure, %         | 10.7           | 9.2            | 8.6            | 9.5           | 0.734  |
| Diabetes, %                         | 14.2           | 14.4           | 13.9           | 16.5          | 0.856  |
| pO <sub>2</sub> , kPa (SD)          | 8.5 (4.4)      | 8.6 (3.2)      | 9.3 (3.8)      | 9.9 (4.8)     | <0.001 |
| pCO <sub>2</sub> , kPa (SD)         | 7.0 (2.5)      | 5.8 (1.7)      | 5.5 (1.7)      | 5.4 (1.9)     | <0.001 |
| HCO <sub>3</sub> , mmol/L, (SD)     | 30.1 (7.4)     | 28.0 (5.4)     | 26.7 (4.8)     | 26.0 (5.9)    | <0.001 |
| Albumin <36 g/l, %                  | 28.3           | 22.2           | 18.7           | 16.9          | <0.001 |
| CRP, mg/L, (SD)                     | 99.3 (114)     | 75.0 (93.6)    | 70.9 (89.8)    | 48.9 (66.0)   | <0.001 |
| WCC, 10 <sup>9</sup> /L, (SD)       | 13.1 (6.3)     | 12.9 (5.5)     | 13.5 (12.4)    | 12.6 (5.4)    | 0.491  |
| Treated with NIV, %                 | 32.2           | 8.2            | 3.9            | 6.0           | <0.001 |

Appendix table 2. Relationship between admission oxygen saturation group and inpatient mortality in multivariate analysis in patients receiving supplemental oxygen.

|                    | Died / total | Multivariate analysis |             |         |
|--------------------|--------------|-----------------------|-------------|---------|
|                    |              | RR                    | 95% CI      | P value |
| Oxygen saturations |              |                       |             |         |
| - 88-92%           | 25 / 282     | 1                     | Reference   | -       |
| - 97-100%          | 38 / 223     | 2.00                  | 1.38 - 2.90 | <0.001  |
| - 93-96%           | 44 / 375     | 1.36                  | 0.92 – 2.02 | 0.127   |
| - 87% or less      | 25 / 147     | 1.32                  | 0.85 – 2.03 | 0.214   |
| NEWS2-sats         | -            | 1.11                  | 1.05 – 1.18 | <0.001  |
| DECAF              | -            | 1.78                  | 2.03 – 2.95 | <0.001  |

CI= confidence interval, DECAF= dyspnoea, eosinopenia, chest x-ray consolidation, acidaemia, atrial fibrillation, NEWS2= National Early Warning Score, RR= Relative Risk.

Appendix table 3. Relationship between admission oxygen saturation group and inpatient mortality in multivariate analysis in patients receiving supplemental oxygen, with and without hypercapnia.

|                    | Died/ total | Multivariate analysis |             |         |
|--------------------|-------------|-----------------------|-------------|---------|
|                    |             | RR                    | 95% CI      | P value |
| Normocapnia        | N= 50 / 476 |                       |             |         |
| Oxygen saturations |             |                       |             |         |
| - 88-92%           | 9 / 139     | 1                     | Reference   | -       |
| - 97-100%          | 16 / 105    | 3.27                  | 1.66 – 6.45 | 0.001   |
| - 93-96%           | 17 / 184    | 2.28                  | 1.15 – 4.51 | 0.018   |
| - 87% or less      | 8 / 47      | 2.14                  | 1.04 – 4.37 | 0.038   |
| NEWS2-sats         |             | 1.09                  | 1.01 – 1.18 | 0.033   |
| DECAF              |             | 2.00                  | 1.73 – 2.32 | <0.001  |
| Hypercapnia        | N= 81 / 551 |                       |             |         |
| Oxygen saturations |             |                       |             |         |
| - 88-92%           | 15 / 143    | 1                     | Reference   | -       |
| - 97-100%          | 22 / 118    | 1.60                  | 1.07 – 2.40 | 0.025   |
| - 93-96%           | 27 / 191    | 1.08                  | 0.70 – 1.69 | 0.721   |
| - 87% or less      | 17 / 99     | 1.05                  | 0.64 – 1.71 | 0.861   |
| NEWS2-sats         |             | 1.13                  | 1.05 – 1.22 | <0.001  |
| DECAF              |             | 1.70                  | 1.47 – 1.95 | <0.001  |

CI= confidence interval, DECAF= dyspnoea, eosinopenia, chest x-ray consolidation, acidaemia, atrial fibrillation, NEWS2= National Early Warning Score, RR= Relative Risk.

Appendix table 4. Relationship between admission oxygen saturation group and inpatient mortality on univariate and multivariate analysis in patients without supplemental oxygen.

|                    | Died/ total   | Multivariate analysis |             |         |
|--------------------|---------------|-----------------------|-------------|---------|
|                    |               | RR                    | 95% CI      | P value |
| Oxygen saturations | N = 96 / 1618 |                       |             |         |
| - 88-92%           | 35/ 479       | 1                     | Reference   | -       |
| - 97-100%          | 4/ 169        | 0.54                  | 0.20 – 1.43 | 0.216   |
| - 93-96%           | 20/ 570       | 0.74                  | 0.45 – 1.22 | 0.242   |
| - 87% or less      | 37/ 401       | 0.93                  | 0.61 – 1.41 | 0.731   |
| NEWS2-sats         |               | 1.11                  | 1.02 – 1.21 | 0.013   |
| DECAF              |               | 2.18                  | 1.90 – 2.50 | <0.001  |

CI= confidence interval, DECAF= dyspnoea, eosinopenia, chest x-ray consolidation, acidaemia, atrial fibrillation, NEWS2= National Early Warning Score, RR= Relative Risk.

Appendix table 5. Odds ratios, 95% confidence intervals, and p values for one year mortality in patients treated with supplemental oxygen at admission grouped by admission oxygen saturations and baseline carbon dioxide.

|             |         | p value | Odds ratio | 95% CI    |       |
|-------------|---------|---------|------------|-----------|-------|
|             |         |         |            | Lower     | Upper |
| Normocapnia | 88-92%  |         | 1.00       | reference |       |
|             | 97-100% | 0.13    | 0.60       | 0.31      | 1.17  |
|             | 93-96%  | 0.15    | 0.68       | 0.40      | 1.16  |
|             | <88%    | 0.81    | 0.90       | 0.40      | 2.03  |
| Hypercapnia | 88-92%  |         | 1.00       | reference |       |
|             | 97-100% | 0.84    | 1.06       | 0.60      | 1.85  |
|             | 93-96%  | 0.06    | 0.61       | 0.36      | 1.03  |
|             | <88%    | 0.99    | 1.00       | 0.55      | 1.82  |
| All         | 88-92%  |         | 1.00       | reference |       |
|             | 97-100% | 0.41    | 0.84       | 0.55      | 1.27  |
|             | 93-96%  | 0.02    | 0.64       | 0.44      | 0.93  |
|             | <88%    | 0.95    | 1.01       | 0.63      | 1.62  |

## Appendix, multiple imputation

Multiple imputation is a statistical method which is used to deal with missing data.[1] Rather than impute a single missing value, multiple datasets are created and the values are pooled at the end of the analysis. As a consequence, the numerator and denominator can vary by a small number between each imputation dataset.

For example, for the 88-92% group the outcome for the five imputation sets are:

- 1) Died 24, survived 284 = 8.45%
- 2) Died 25, survived 283 = 8.83%
- 3) Died 24, survived 281 = 8.54%
- 4) Died 24, survived 281 = 8.54%
- 5) Died 25, survived 281 = 8.90%

These are pooled to give the following result. Died 24.4, survived 282.0 = 8.65%

When reporting the number of patients, we have rounded them to the nearest whole number (for example died 25, survived 282 = 8.9%). This accounts for the slight discrepancy in values if the numbers are calculated by hand from the reported digits which are rounded to the whole number. Furthermore, this is also why the sum of the number of patients in groups may be higher than the reported total group number.

[1] Rubin DB. Multiple imputation after 18+ years. *Journal of the American Statistical Association* 1996; **91**: 473-89.
